# Supplementary material for: Metabolic Impact of Anticancer Drugs Pd2Spermine and Cisplatin on the Brain of Healthy Mice
Source: MDPI journal article supplement (doi:10.3390/pharmaceutics14020259), 2022-01-22
Supplement: s1 [file s1]

# Metabolic Impact of Anticancer Drugs Pd<sub>2</sub>Spermine and Cisplatin on the Brain of Healthy Mice

Tatiana J. Carneiro <sup>1</sup>, Martin Vojtek <sup>2</sup>, Salomé Gonçalves-Monteiro <sup>2</sup>, João R. Neves <sup>1</sup>, Ana L.M. Batista de Carvalho <sup>3</sup>, Maria Paula M. Marques <sup>3,4</sup>, Carmen Diniz <sup>2</sup> and Ana M. Gil <sup>1,\*</sup>

<sup>1</sup> Department of Chemistry and CICECO-Aveiro Institute of Materials, University of Aveiro, 3810-193 Aveiro, Portugal; tatiana.joa@ua.pt (T.J.C.), joaodrneves@ua.pt (J.R.N.)

<sup>2</sup> LAQV/REQUIMTE, Laboratory of Pharmacology, Department of Drug Sciences, Faculty of Pharmacy, University of Porto, 4150-755 Porto, Portugal; matovoj@gmail.com (M.V.), salomemonteiro8180@gmail.com (S.G.-M.), cdiniz@ff.up.pt (C.D.)

<sup>3</sup> Molecular Physical-Chemistry R&D Unit, Department of Chemistry, University of Coimbra, 3004-535 Coimbra, Portugal; almbc@uc.pt (A.L.M.B.d.C.), pmc@ci.uc.pt (M.P.M.M.)

<sup>4</sup> Department of Life Sciences, Faculty of Science and Technology, University of Coimbra, 3000-456 Coimbra, Portugal

\* Correspondence: agil@ua.pt; Tel.: +351-234370707

## Content of Supplementary Materials:

**Figure S1.** PCA and PLS-DA scores scatter plots for the <sup>1</sup>H NMR spectra of polar extracts from brain of healthy BALB/c mice after exposure to cDDP at a) 1 h, b) 12 h, and c) 48 h post-injections times, compared to controls.

**Figure S2.** PCA and PLS-DA scores scatter plots for the <sup>1</sup>H NMR spectra of polar extracts from brain of healthy BALB/c mice after exposure to Pd<sub>2</sub>Spm at a) 1 h, b) 12 h, and c) 48 h post-injections times, compared to controls.

**Figure S3.** Examples of <sup>1</sup>H NMR spectral regions illustrating differences in a) polar and b) nonpolar metabolites between cDDP-exposed (blue trace) and Pd<sub>2</sub>Spm-exposed (red trace), after 48 h of exposure.

**Figure S4.** PCA and PLS-DA scores scatter plots for the <sup>1</sup>H NMR spectra of nonpolar extracts from brain of healthy BALB/c mice after exposure to cDDP at a) 1 h, b) 12 h, and c) 48 h post-injections times, compared to controls.

**Figure S5.** PCA and PLS-DA scores scatter plots for the <sup>1</sup>H NMR spectra of nonpolar extracts from brain of healthy BALB/c mice after exposure to Pd<sub>2</sub>Spm at a) 1 h, b) 12 h, and c) 48 h post-injections times, compared to controls.

**Table S1.** List of metabolites and corresponding spin systems identified in the 500MHz <sup>1</sup>H NMR spectra of polar and nonpolar extracts of brain from healthy BALB/c mice, at 1 h post-injection time with phosphate buffer saline.

**Table S2.** Significant metabolite variations (expressed in effect size, ES) in the polar (top) and nonpolar (bottom) metabolomes of mice brain exposed to Pd<sub>2</sub>Spm, compared to cDDP, at 1, 12 and 48 h post-injection times.

Figure S1

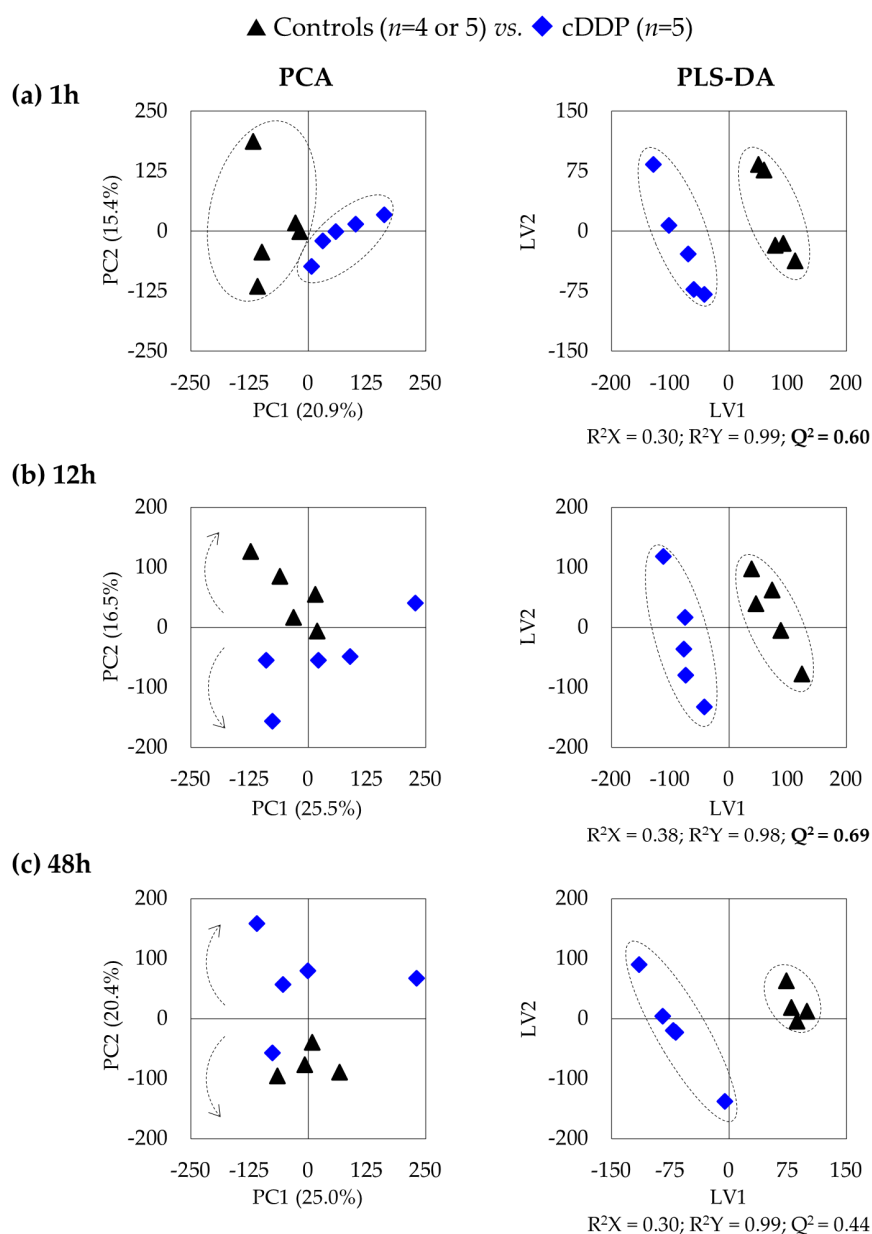

**Figure S1.** PCA and PLS-DA scores scatter plots for the  $^1\text{H}$  NMR spectra of polar extracts from brain of healthy BALB/c mice after exposure to cDDP at a) 1 h, b) 12 h, and c) 48 h post-injections times, compared to controls. Validation parameters ( $R^2$  and  $Q^2$ ) are indicated for each PLS-DA model;  $Q^2$  values  $> 0.5$  are highlighted in bold.

Figure S2

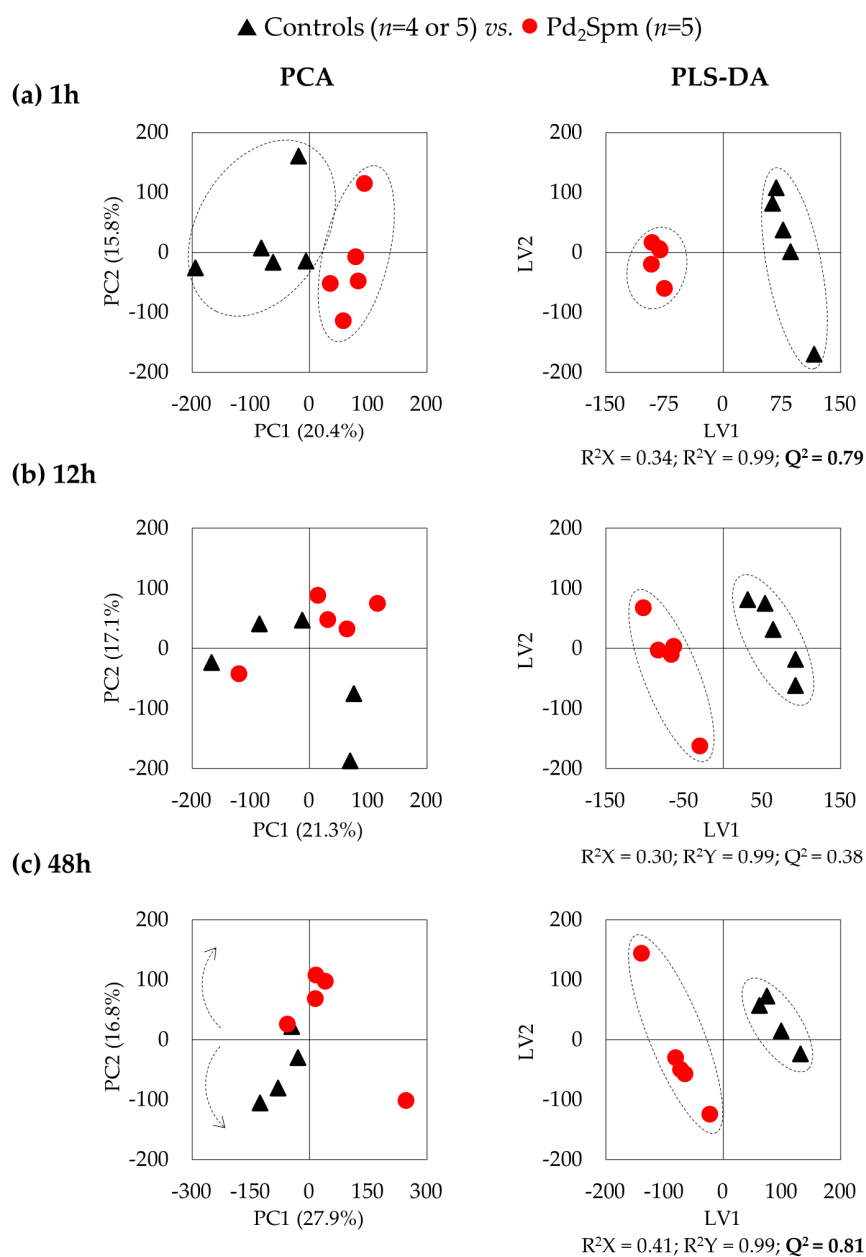

**Figure S2.** PCA and PLS-DA scores scatter plots for the <sup>1</sup>H NMR spectra of polar extracts from brain of healthy BALB/c mice after exposure to Pd<sub>2</sub>Spm at a) 1 h, b) 12 h, and c) 48 h post-injections times, compared to controls. In PLS-DA models,  $Q^2$  values > 0.5 (in bold) represent robust models.

**Figure S3****a) Polar metabolites**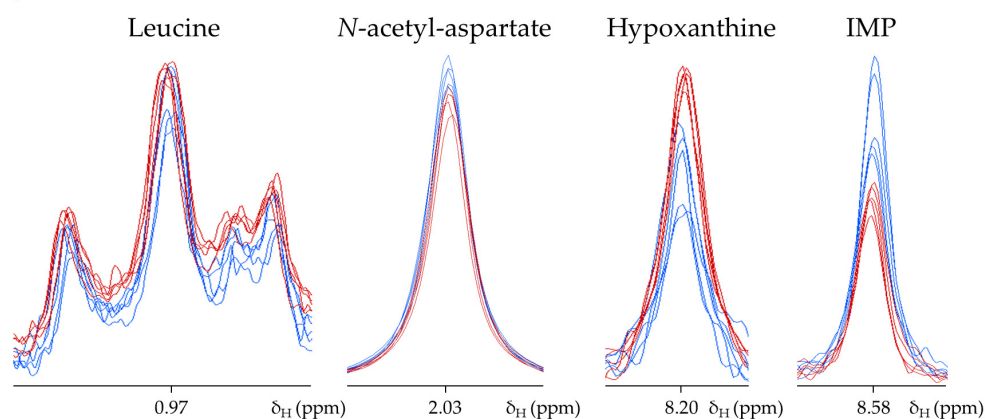**b) Nonpolar metabolites**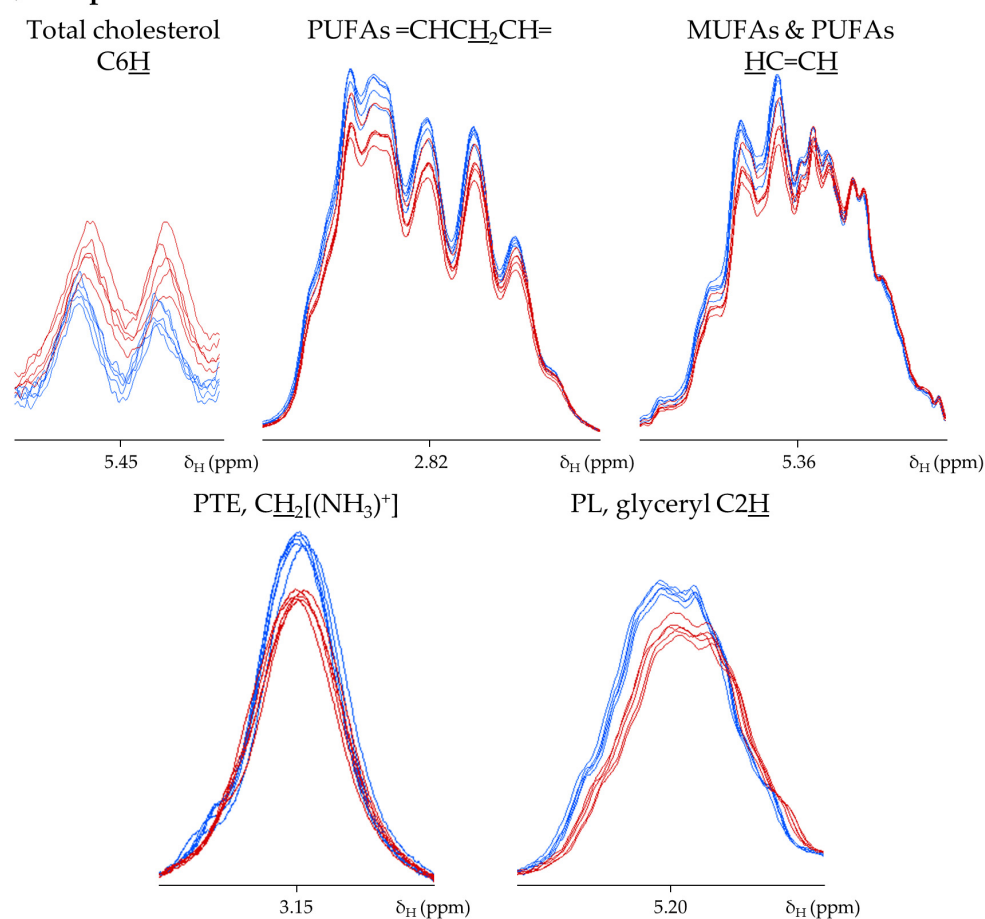**Figure S3.** Examples of  $^1\text{H}$  NMR spectral regions illustrating differences in a) polar and b) nonpolar metabolites between cDDP-exposed (blue trace) and Pd<sub>2</sub>Spm-exposed (red trace), after 48 h of exposure.

Figure S4

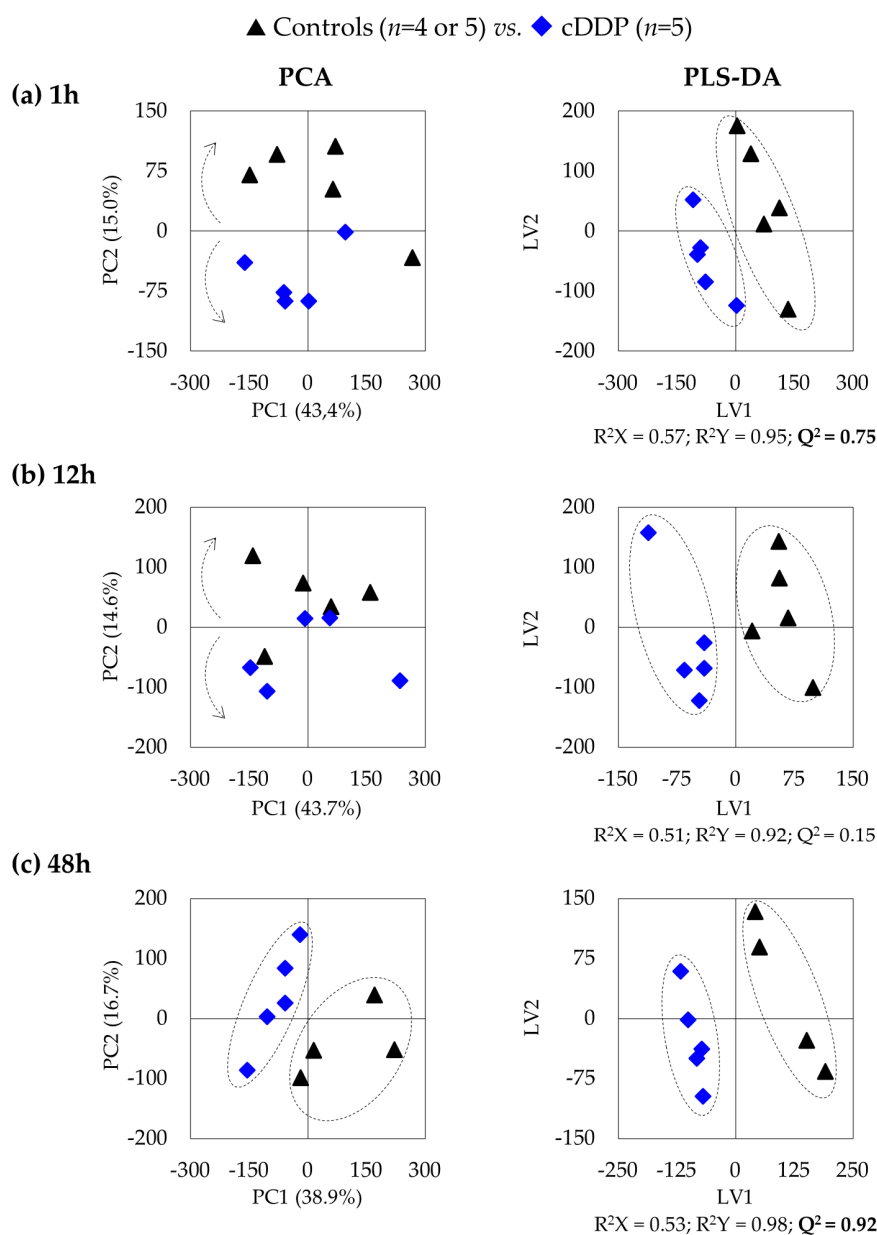

**Figure S4.** PCA and PLS-DA scores scatter plots for the  $^1\text{H}$  NMR spectra of nonpolar extracts from brain of healthy BALB/c mice after exposure to cDDP at a) 1 h, b) 12 h, and c) 48 h post-injections times, compared to controls. In PLS-DA models,  $Q^2$  values  $> 0.5$  (in bold) represent robust models.

Figure S5

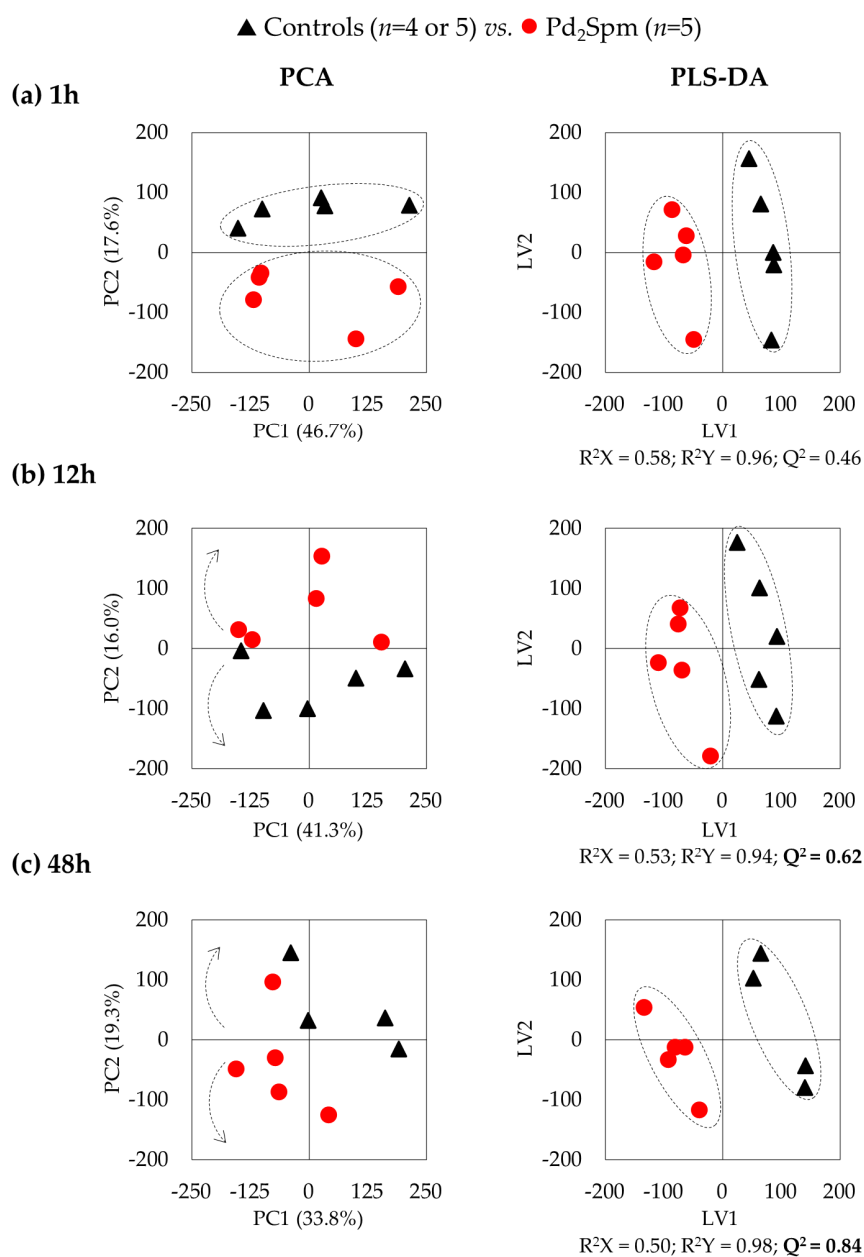

**Figure S5.** PCA and PLS-DA scores scatter plots for the <sup>1</sup>H NMR spectra of nonpolar extracts from brain of healthy BALB/c mice after exposure to Pd<sub>2</sub>Spm at a) 1 h, b) 12 h, and c) 48 h post-injections times, compared to controls. In PLS-DA models,  $Q^2$  values > 0.5 (in bold) represent robust models.

**Table S1.** List of metabolites and corresponding spin systems identified in the 500MHz  $^1\text{H}$  NMR spectra of polar and nonpolar extracts of brain from healthy BALB/c mice, at 1 h post-injection time with phosphate buffer saline. <sup>a</sup> Pre-dominant metabolites; <sup>b</sup> Metabolites identified, for the first time to our knowledge, by  $^1\text{H}$  NMR in brain extracts of rodent models; \* Possible contamination due to the extraction procedure; <sup>†</sup> Tentative assignment. Human Metabolome Database (HMDB ID) metabolite identification codes are indicated whenever possible. Abbreviations: 3-HBA, 3-hydroxybutyrate; ADP, adenosine diphosphate; AMP, adenosine monophosphate; ATP, adenosine triphosphate; DMA, dimethylamine; DMSO<sub>2</sub>, dimethyl sulfone; GABA,  $\gamma$ -aminobutyrate; GPC, glycerophosphocholine; GSH, glutathione (reduced); HX, hypoxanthine; IMP, inosine monophosphate; MUFAs, monounsaturated fatty acids; NAD<sup>+</sup>, nicotinamide adenine dinucleotide; PC, phosphocholine; PE, phosphoethanolamine; PL, phospholipid; PTC, phosphatidylcholine; PTE, phosphatidylethanolamine; PUFAs, polyunsaturated fatty acids; SM, sphingomyelin; TMAO, Trimethylamine *N*-oxide; s, singlet; d, doublet; dd, double doublet; t, triplet; q, quartet; m, multiplet; br, broad signal.

|                             | Metabolite                             | $\delta_{\text{H}}$ ppm (multiplicity, assignment)                                                                            | HMDB ID [61] |
|-----------------------------|----------------------------------------|-------------------------------------------------------------------------------------------------------------------------------|--------------|
| <b>Polar extracts</b>       |                                        |                                                                                                                               |              |
| Amino acids and derivatives | Alanine                                | 1.48 (d, $\beta\text{CH}_3$ ); 3.78 (q, $\alpha\text{CH}$ )                                                                   | HMDB0000161  |
|                             | Asparagine <sup>†</sup>                | 2.83 (m, $\beta\text{CH}_2$ )                                                                                                 | HMDB0000168  |
|                             | Aspartate                              | 2.68 (dd, $\beta\text{CH}$ ); 2.81 (dd, $\beta'\text{CH}$ ); 3.90 (dd, $\alpha\text{CH}$ )                                    | HMDB0000191  |
|                             | Creatine <sup>a</sup>                  | 3.04 (s, N-CH <sub>3</sub> ); 3.93 (s, N-CH <sub>2</sub> )                                                                    | HMDB0000064  |
|                             | GABA <sup>a</sup>                      | 1.90 (m, $\beta\text{CH}_2$ ); 2.30 (t, $\gamma\text{CH}_2$ ); 3.01 (t, $\alpha\text{CH}_2$ )                                 | HMDB0000112  |
|                             | Glutamate <sup>a</sup>                 | 2.04 (m, $\beta\text{CH}$ ); 2.11 (m, $\beta'\text{CH}$ ); 2.36 (m, $\gamma\text{CH}_2$ ); 3.76 (dd, $\alpha\text{CH}$ )      | HMDB0000148  |
|                             | Glutamine                              | 2.14 (m, $\beta\text{CH}_2$ ); 2.45 (m, $\gamma\text{CH}_2$ ); 3.77 (t, $\alpha\text{CH}$ )                                   | HMDB0000641  |
|                             | Glycine                                | 3.55 (s, $\alpha\text{CH}_2$ )                                                                                                | HMDB0000123  |
|                             | Histidine                              | 7.06 (s, C4H ring); 8.00 (s, C2H ring)                                                                                        | HMDB0000177  |
|                             | Isoleucine                             | 0.94 (t, $\delta\text{CH}_3$ ); 1.01 (d, $\beta'\text{CH}_3$ ); 1.99 (m, $\beta\text{CH}$ )                                   | HMDB0000177  |
|                             | Leucine                                | 0.96 (t, $\delta\text{CH}_3/\delta'\text{CH}_3$ ); 1.71 (m, $\beta\text{CH}_2/\gamma\text{CH}$ )                              | HMDB0000687  |
|                             | Lysine                                 | 1.45 (m, $\gamma\text{CH}_2$ ); 1.73 (m, $\delta\text{CH}_2$ ); 1.92 (m, $\beta\text{CH}_2$ )                                 | HMDB0000182  |
|                             | <i>N</i> -acetylaspartate <sup>a</sup> | 2.02 (s, CH); 2.50, 2.70 (m, CH <sub>2</sub> ); 4.40 (m, CH <sub>3</sub> )                                                    | HMDB0000812  |
|                             | Phenylalanine                          | 7.33 (d, C2H/ C6H ring); 7.38 (m, C4H ring); 7.42 (t, C3H/ C5H ring)                                                          | HMDB0000159  |
|                             | Taurine <sup>a</sup>                   | 3.27 (t, S-CH <sub>2</sub> ); 3.43 (t, N-CH <sub>2</sub> )                                                                    | HMDB0000251  |
| Choline derivatives         | Tyrosine                               | 6.90 (d, C3H/ C5H ring); 7.20 (d, C2H/ C6H ring)                                                                              | HMDB0000158  |
|                             | Valine                                 | 0.99 (d, $\gamma\text{CH}_3$ ); 1.05 (d, $\gamma'\text{CH}_3$ ); 2.27 (m, $\beta\text{CH}$ ); 3.61 (d, $\alpha\text{CH}$ )    | HMDB0000883  |
|                             | Choline <sup>a</sup>                   | 3.21 (s, N(CH <sub>3</sub> ) <sub>3</sub> )                                                                                   | HMDB0000097  |
| Nucleotides and derivatives | GPC                                    | 3.23 (s, N(CH <sub>3</sub> ) <sub>3</sub> ); 3.92 (m, $\alpha\text{CH}_2$ ); 4.33 (m, PO <sub>3</sub> - $\alpha\text{CH}_2$ ) | HMDB0000086  |
|                             | PC <sup>a</sup>                        | 3.22 (s, N(CH <sub>3</sub> ) <sub>3</sub> ); 4.17 (m, PO <sub>3</sub> -CH <sub>2</sub> )                                      | HMDB0001565  |
|                             | Adenine <sup>b, †</sup>                | 8.23 (s, C2H ring)                                                                                                            | HMDB0000034  |
|                             | Adenosine                              | 4.29 (q, C4'H ribose); 4.44 (dd, C3'H ribose); 6.10 (d, C1'H ribose); 8.12 (s, C8H ring); 8.27 (s, C2H ring)                  | HMDB0000050  |
|                             | ADP                                    | 6.15 (d, C1'H ribose); 8.27 (s, C2H ring); 8.54 (s, C8H ring)                                                                 | HMDB0001341  |
|                             | AMP                                    | 4.51 (dd, C2'H ribose); 6.14 (d, C1'H ribose); 8.27 (s, C2H ring); 8.61 (s, C8H ring)                                         | HMDB0000045  |
|                             | ATP                                    | 6.15 (d, C1'H ribose); 8.28 (s, C2H ring); 8.545 (s, C8H ring)                                                                | HMDB0000538  |
|                             | Hypoxanthine <sup>b</sup>              | 8.18 (s, C2H); 8.20 (s, C8H)                                                                                                  | HMDB0000157  |
|                             | IMP                                    | 8.24 (s, C8H ring); 8.58 (s, C8H ring)                                                                                        | HMDB0000175  |
|                             | Inosine                                | 6.10 (d, C1'H); 8.24 (s, C8H ring); 8.35 (s, C2H ring)                                                                        | HMDB0000195  |
|                             | NAD <sup>++</sup>                      | 8.43 (s, A8)                                                                                                                  | HMDB0000902  |
|                             | Uridine                                | 5.90 (d, C5H ring); 5.92 (d, C1'H ring); 7.88 (d, C6H ring)                                                                   | HMDB0000285  |
| Organic                     | 3-HBA                                  | 1.20 (d, CH <sub>3</sub> ); 2.31 (m, CH <sub>2</sub> )                                                                        | HMDB0000357  |
|                             | Acetate                                | 1.92 (s, CH <sub>3</sub> )                                                                                                    | HMDB0000042  |

|                   |                                   |                                                                                                                                                                                                                                                                                                                                                                                                                      |                                                                                                                                      |
|-------------------|-----------------------------------|----------------------------------------------------------------------------------------------------------------------------------------------------------------------------------------------------------------------------------------------------------------------------------------------------------------------------------------------------------------------------------------------------------------------|--------------------------------------------------------------------------------------------------------------------------------------|
|                   | Ascorbate                         | 4.52 (d, C4H ring)                                                                                                                                                                                                                                                                                                                                                                                                   | HMDB0000044                                                                                                                          |
|                   | Formate                           | 8.46 (s, CH)                                                                                                                                                                                                                                                                                                                                                                                                         | HMDB0000142                                                                                                                          |
|                   | Fumarate                          | 6.52 (s, CH)                                                                                                                                                                                                                                                                                                                                                                                                         | HMDB0000134                                                                                                                          |
|                   | Lactate <sup>a</sup>              | 1.33 (d, CH <sub>3</sub> ); 4.10 (q, CH)                                                                                                                                                                                                                                                                                                                                                                             | HMDB0000190                                                                                                                          |
|                   | Succinate                         | 2.41 (s, CH <sub>2</sub> )                                                                                                                                                                                                                                                                                                                                                                                           | HMDB0000254                                                                                                                          |
| Other compounds   | Acetone <sup>b</sup>              | 2.24 (s, CH <sub>3</sub> )                                                                                                                                                                                                                                                                                                                                                                                           | HMDB0001659                                                                                                                          |
|                   | DMA <sup>b</sup>                  | 2.73 (s, (CH <sub>3</sub> ) <sub>2</sub> )                                                                                                                                                                                                                                                                                                                                                                           | HMDB0000087                                                                                                                          |
|                   | DMSO <sub>2</sub> <sup>b, †</sup> | 3.15 (s, CH <sub>3</sub> )                                                                                                                                                                                                                                                                                                                                                                                           | HMDB0004983                                                                                                                          |
|                   | Ethanol <sup>*</sup>              | 1.19 (t, CH <sub>3</sub> ); 3.65 (q, CH <sub>2</sub> )                                                                                                                                                                                                                                                                                                                                                               | HMDB0000108                                                                                                                          |
|                   | <i>m</i> -Inositol <sup>a</sup>   | 3.28 (t, C5H); 3.54 (dd, C1H/ C3H) 3.62 (t, C4H/ C6H);<br>4.06 (t, C2H)                                                                                                                                                                                                                                                                                                                                              | HMDB0000211                                                                                                                          |
|                   | Niacinamide                       | 7.60 (m, C5H); 8.72 (m, C4H, C6H); 8.94 (m, C2H)                                                                                                                                                                                                                                                                                                                                                                     | HMDB0001406                                                                                                                          |
|                   | PE <sup>b, †</sup>                | 3.99 (m, PO <sub>3</sub> -CH <sub>2</sub> )                                                                                                                                                                                                                                                                                                                                                                          | HMDB0000224                                                                                                                          |
|                   | Propylene glycol <sup>*</sup>     | 1.15 (d, CH <sub>3</sub> ); 3.87 (m, CH)                                                                                                                                                                                                                                                                                                                                                                             | HMDB0001881                                                                                                                          |
|                   | TMAO <sup>b</sup>                 | 3.27 (s, CH <sub>3</sub> )                                                                                                                                                                                                                                                                                                                                                                                           | HMDB0000925                                                                                                                          |
| Nonpolar extracts |                                   |                                                                                                                                                                                                                                                                                                                                                                                                                      |                                                                                                                                      |
| Cholesterol       | Free <sup>a</sup>                 | 0.68 (s, C18H <sub>3</sub> ); 0.86 (d, C26H <sub>3</sub> ); 0.87 (d, C27H <sub>3</sub> ); 0.91 (s, C27H <sub>3</sub> ); 0.95 (m, C9H); 0.99 (m, C14H); 1.01 (s, C19H <sub>3</sub> ); 1.07 (m, C1H); 1.10 (m, C17H); 1.12 (m, C23H/ C24H); 1.13 (m, C22H); 1.49 (m, C11H); 1.51 (m, C2H); 1.84 (m, C4H); 1.87 (t, C16H); 1.95 (t, C7H); 1.99 (t, C7H'); 2.26 (t, C4H'); 3.53 (m, C3H); 5.45 (d, C6H)                  | HMDB0000067                                                                                                                          |
|                   | Esterified                        | 0.68 (s, C18H <sub>3</sub> ); 0.86 (d, C26H <sub>3</sub> ); 0.87 (d, C27H <sub>3</sub> ); 0.91 (s, C27H <sub>3</sub> ); 0.95 (m, C9H); 0.99 (m, C14H); 1.01 (s, C19H <sub>3</sub> ); 1.10 (m, C17H); 1.12 (m, C23H/ C24H); 1.13 (m, C22H); 1.15 (m, C1H); 1.84 (t, C4H); 1.87 (t, C15H'); 1.95 (t, C7H); 1.99 (t, C7H'); 2.31 (t, C4H'); 5.45 (d, C6H)                                                               | Undefined                                                                                                                            |
| Fatty acids (FA)  | Saturated                         | 0.89 (br, CH <sub>3</sub> ); 1.25 (br, (CH <sub>2</sub> ) <sub>n</sub> ); 2.30 (m, CH <sub>2</sub> CO)                                                                                                                                                                                                                                                                                                               | Undefined                                                                                                                            |
|                   | Monounsaturated                   | 2.02 (ω7/ω9 CH <sub>2</sub> CH <sub>2</sub> CH=); 2.30 (m, ω7/ω9 CH <sub>2</sub> CO); 5.34 (m, HC=CH)                                                                                                                                                                                                                                                                                                                | 16:1 (Δ <sup>9</sup> ;ω7), HMDB0031053 /<br>18:1 (Δ <sup>9</sup> ;ω9), HMDB0000207                                                   |
|                   | Polyunsaturated <sup>a</sup>      | 0.93 (t, ω6 CH <sub>3</sub> ); 0.98 (t, ω3 CH <sub>3</sub> ); 1.30 (m, (CH <sub>2</sub> ) <sub>n</sub> ); 1.33 (m, ω3/ω6 =CHCH <sub>2</sub> (CH <sub>2</sub> ) <sub>n</sub> ); 2.05 (m, CH <sub>2</sub> CH=); 2.30 (m, CH <sub>2</sub> CO); 2.77 (t, 18:2 =CHCH <sub>2</sub> CH=); 2.81 (m, ω3/ω6 =CHCH <sub>2</sub> CH=); 2.82 (m, 22:6 =CHCH <sub>2</sub> CH=); 2.84 (m, 22:6 CH <sub>2</sub> CO); 5.37 (m, HC=CH) | 18:2 (Δ <sup>9,12</sup> ; ω6), HMDB0000673<br>22:6 (Δ <sup>4,7,10,13,16,19</sup> ; ω3), HMDB0002183<br>and other undefined ω3/ω6 FAs |
| Phospholipids     | PL resonances                     | 3.75 (br, CH <sub>2</sub> N(CH <sub>3</sub> ) <sub>3</sub> ); 3.94 (br, Glyceryl C3H <sub>2</sub> ); 4.38 (br, POCH <sub>2</sub> ); 4.40 (br, Glyceryl C1H <sub>2</sub> ); 5.20 (br, Glyceryl C2H)                                                                                                                                                                                                                   | Undefined                                                                                                                            |
|                   | PTC <sup>a</sup>                  | 3.31 (s, N(CH <sub>3</sub> ) <sub>3</sub> ); 4.12 (m, Glyceryl, C1H <sub>2</sub> )                                                                                                                                                                                                                                                                                                                                   | Undefined                                                                                                                            |
|                   | PTE <sup>a</sup>                  | 3.15 (br, CH <sub>2</sub> [(NH <sub>3</sub> ) <sup>+</sup> ]); 8.60 (br, [(NH <sub>3</sub> ) <sup>+</sup> ])                                                                                                                                                                                                                                                                                                         | Undefined                                                                                                                            |
|                   | SM                                | 3.29 (s, N(CH <sub>3</sub> ) <sub>3</sub> )                                                                                                                                                                                                                                                                                                                                                                          | Undefined                                                                                                                            |



**Table S2.** Significant metabolite variations (expressed in effect size, ES) in the polar (top) and nonpolar (bottom) metabolomes of mice brain exposed to Pd2Spm, compared to cDDP, at 1, 12 and 48 h post-injection times. Only variations with  $|ES| > ES$  Error and  $p$ -value  $< 0.05$  are shown. <sup>†</sup> Tentative assignment. <sup>‡</sup> Partial integration of resonance peak. <sup>a</sup> Metabolic variation statistically significant after False Discovery Rate (FDR) correction; <sup>b</sup> Metabolite observed to vary only in the direct comparison of the two drugs (and not in comparison with controls). Abbreviations as defined in Tables 1 and S1.

|                                     |                                                                                   |                                    | Pd2Spm vs. cDDP |                                    |                 |                                   |                                   |                                   |                                   |             |                 |
|-------------------------------------|-----------------------------------------------------------------------------------|------------------------------------|-----------------|------------------------------------|-----------------|-----------------------------------|-----------------------------------|-----------------------------------|-----------------------------------|-------------|-----------------|
| Metabolite                          |                                                                                   | $\delta_H$ / ppm<br>(multiplicity) | 1h              |                                    |                 | 12h                               |                                   |                                   | 48h                               |             |                 |
| Family/ assignment                  |                                                                                   |                                    | ES              | $\pm$ Error                        | <i>p</i> -value | ES                                | $\pm$ Error                       | <i>p</i> -value                   | ES                                | $\pm$ Error | <i>p</i> -value |
| Amino acids<br>and deriva-<br>tives | Alanine                                                                           | 1.48 (d)                           | -3.2 $\pm$ 1.9  | $2.4 \times 10^{-3}$ <sup>a</sup>  | —               | —                                 | —                                 | 1.5 $\pm$ 1.4                     | $4.9 \times 10^{-2}$              |             |                 |
|                                     | Leucine                                                                           | 0.96 (t)                           | -1.8 $\pm$ 1.5  | $2.4 \times 10^{-2}$               | —               | —                                 | —                                 | 3.1 $\pm$ 1.8                     | $5.1 \times 10^{-3}$ <sup>a</sup> |             |                 |
|                                     | <i>N</i> -acetylaspartate                                                         | 2.03 (s)                           | —               | —                                  | —               | —                                 | —                                 | -3.0 $\pm$ 1.8                    | $1.7 \times 10^{-3}$ <sup>a</sup> |             |                 |
|                                     | Taurine <sup>b</sup>                                                              | 3.43 (t)                           | —               | —                                  | —               | —                                 | —                                 | -2.4 $\pm$ 1.6                    | $1.3 \times 10^{-2}$              |             |                 |
|                                     | Valine                                                                            | 1.05 (d)                           | -3.0 $\pm$ 1.8  | $1.7 \times 10^{-3}$ <sup>a</sup>  | —               | —                                 | —                                 | —                                 | —                                 |             |                 |
| Choline deriv-<br>atives            | Glycerophosphocholine                                                             | 3.23 (s)                           | 2.5 $\pm$ 1.7   | $1.4 \times 10^{-2}$               | —               | —                                 | —                                 | —                                 | —                                 |             |                 |
|                                     | Phosphocholine <sup>b</sup>                                                       | 3.21 (s)                           | —               | —                                  | —               | —                                 | —                                 | -2.1 $\pm$ 1.5                    | $1.2 \times 10^{-2}$              |             |                 |
| Nucleotides<br>and deriva-<br>tives | Adenine <sup>†</sup> , <sup>b</sup>                                               | 8.23 (s)                           | —               | —                                  | —               | —                                 | —                                 | -2.2 $\pm$ 1.6                    | $2.0 \times 10^{-2}$              |             |                 |
|                                     | Adenosine                                                                         | 4.29 (q)                           | —               | —                                  | —               | —                                 | —                                 | 1.5 $\pm$ 1.4                     | $1.6 \times 10^{-2}$              |             |                 |
|                                     | ADP                                                                               | 8.54 (s)                           | 1.9 $\pm$ 1.5   | $1.8 \times 10^{-2}$               | —               | —                                 | —                                 | -1.6 $\pm$ 1.4                    | $3.9 \times 10^{-2}$              |             |                 |
|                                     | HX                                                                                | 8.20 (s)                           | —               | —                                  | —               | —                                 | —                                 | 2.9 $\pm$ 1.8                     | $6.2 \times 10^{-3}$ <sup>a</sup> |             |                 |
|                                     | IMP                                                                               | 8.58 (s)                           | —               | —                                  | —               | —                                 | —                                 | -3.0 $\pm$ 1.8                    | $4.8 \times 10^{-3}$ <sup>a</sup> |             |                 |
|                                     | Inosine                                                                           | 8.35 (s)                           | -1.8 $\pm$ 1.5  | $2.8 \times 10^{-2}$               | —               | —                                 | —                                 | —                                 | —                                 |             |                 |
| Organic acids                       | Formate                                                                           | 8.46 (s)                           | —               | —                                  | —               | -1.8 $\pm$ 1.5                    | $3.4 \times 10^{-2}$              | —                                 | —                                 |             |                 |
| Other com-<br>pounds                | Acetone                                                                           | 2.24 (s)                           | -5.7 $\pm$ 2.8  | $1.7 \times 10^{-3}$ <sup>a</sup>  | —               | —                                 | —                                 | —                                 | —                                 |             |                 |
|                                     | DMA                                                                               | 2.73 (s)                           | 4.4 $\pm$ 2.3   | $2.3 \times 10^{-3}$ <sup>a</sup>  | —               | —                                 | —                                 | 2.2 $\pm$ 1.6                     | $1.7 \times 10^{-2}$              |             |                 |
|                                     | DMSO <sub>2</sub> <sup>†</sup>                                                    | 3.15 (s)                           | 14.5 $\pm$ 6.5  | $7.9 \times 10^{-3}$               | 3.1 $\pm$ 1.8   | $7.9 \times 10^{-3}$              | —                                 | —                                 | —                                 |             |                 |
| Unassigned<br>resonances            | U1                                                                                | 0.80 (t)                           | -2.2 $\pm$ 1.6  | $2.1 \times 10^{-2}$               | —               | —                                 | —                                 | —                                 | —                                 |             |                 |
|                                     | U4 <sup>b</sup>                                                                   | 2.06 (st)                          | —               | —                                  | —               | —                                 | —                                 | 2.4 $\pm$ 1.6                     | $3.2 \times 10^{-2}$              |             |                 |
|                                     | U5 <sup>b</sup>                                                                   | 6.08 (s)                           | —               | —                                  | —               | —                                 | —                                 | -1.8 $\pm$ 1.5                    | $4.5 \times 10^{-2}$              |             |                 |
| Cholesterol                         | Free, C3H                                                                         | 3.53 (m)                           | —               | —                                  | —               | —                                 | —                                 | —                                 | —                                 |             |                 |
|                                     | Total, C6H                                                                        | 5.45 (d)                           | —               | —                                  | —               | —                                 | —                                 | 3.1 $\pm$ 1.8                     | $7.9 \times 10^{-3}$ <sup>a</sup> |             |                 |
|                                     | Total, C7H & C7H'                                                                 | 1.95-1.97                          | —               | —                                  | —               | —                                 | —                                 | 3.2 $\pm$ 1.9                     | $2.7 \times 10^{-3}$ <sup>a</sup> |             |                 |
|                                     | Total, C26H <sub>3</sub>                                                          | 0.86 (d)                           | —               | —                                  | —               | —                                 | —                                 | 1.9 $\pm$ 1.5                     | $2.5 \times 10^{-2}$              |             |                 |
|                                     | Total, C27H <sub>3</sub>                                                          | 0.87 (d)                           | —               | —                                  | —               | —                                 | —                                 | 1.8 $\pm$ 1.5                     | $2.8 \times 10^{-2}$              |             |                 |
| Fatty acids                         | CH <sub>3</sub>                                                                   | 0.89 (br)                          | —               | —                                  | —               | —                                 | —                                 | —                                 | —                                 |             |                 |
|                                     | Saturated, (CH <sub>2</sub> ) <sub>n</sub>                                        | 1.25 (br)                          | 2.8 $\pm$ 1.7   | $7.9 \times 10^{-3}$ <sup>a</sup>  | —               | —                                 | —                                 | 4.3 $\pm$ 2.3                     | $1.6 \times 10^{-4}$ <sup>a</sup> |             |                 |
|                                     | MUFAs ( $\Delta^9$ ; $\omega 7/\omega 9$ ), CH <sub>2</sub> CH <sub>2</sub> CH=   | 2.02 (m)                           | —               | —                                  | —               | —                                 | —                                 | 2.8 $\pm$ 1.7                     | $7.9 \times 10^{-3}$ <sup>a</sup> |             |                 |
|                                     | MUFAs, HC=CH                                                                      | 5.34 (m)                           | —               | —                                  | —               | —                                 | —                                 | 2.3 $\pm$ 1.6                     | $7.2 \times 10^{-3}$ <sup>a</sup> |             |                 |
|                                     | PUFAs ( $\omega 3$ ), CH <sub>3</sub>                                             | 0.98 (t)                           | —               | —                                  | —               | —                                 | —                                 | 1.9 $\pm$ 1.5                     | $2.1 \times 10^{-2}$              |             |                 |
|                                     | PUFAs, (CH <sub>2</sub> ) <sub>n</sub>                                            | 1.30 (m)                           | —               | —                                  | —               | —                                 | —                                 | 2.5 $\pm$ 1.6                     | $7.9 \times 10^{-3}$ <sup>a</sup> |             |                 |
|                                     | PUFAs ( $\omega 3/\omega 6$ ), =CHCH <sub>2</sub> (CH <sub>2</sub> ) <sub>n</sub> | 1.33 (m)                           | —               | —                                  | —               | —                                 | —                                 | -1.6 $\pm$ 1.4                    | $3.6 \times 10^{-2}$              |             |                 |
|                                     | PUFAs, CH <sub>2</sub> CH=                                                        | 2.05 (m)                           | —               | —                                  | —               | —                                 | —                                 | 2.3 $\pm$ 1.6                     | $1.1 \times 10^{-2}$ <sup>a</sup> |             |                 |
|                                     | PUFAs ( $\omega 3/\omega 6$ ), =CHCH <sub>2</sub> CH=                             | 2.81 (m)                           | —               | —                                  | —               | —                                 | —                                 | 3.4 $\pm$ 1.9                     | $9.9 \times 10^{-4}$ <sup>a</sup> |             |                 |
|                                     | PUFAs, HC=CH                                                                      | 5.37 (m)                           | —               | —                                  | —               | —                                 | —                                 | -1.9 $\pm$ 1.5                    | $1.6 \times 10^{-2}$ <sup>a</sup> |             |                 |
|                                     | 18:2 ( $\Delta^{9,12}$ ; $\omega 6$ ), =CHCH <sub>2</sub> CH=                     | 2.77 (t)                           | -2.5 $\pm$ 1.7  | $4.29 \times 10^{-3}$ <sup>a</sup> | -1.3 $\pm$ 1.4  | $1.6 \times 10^{-2}$ <sup>a</sup> | -2.4 $\pm$ 1.6                    | $6.5 \times 10^{-3}$ <sup>a</sup> |                                   |             |                 |
|                                     | 22:6 ( $\Delta^{4,7,10,13,16,19}$ ; $\omega 3$ ), CH <sub>2</sub> CO              | 2.38 (m)                           | —               | —                                  | —               | —                                 | —                                 | -2.7 $\pm$ 1.7                    | $3.0 \times 10^{-3}$ <sup>a</sup> |             |                 |
|                                     | 22:6 ( $\Delta^{4,7,10,13,16,19}$ ; $\omega 3$ ), =CHCH <sub>2</sub> CH=          | 2.82 (m)                           | —               | —                                  | —               | —                                 | —                                 | -2.0 $\pm$ 1.5                    | $1.5 \times 10^{-2}$ <sup>a</sup> |             |                 |
|                                     | 3.1 $\pm$ 1.8                                                                     | $7.9 \times 10^{-3}$               | —               | —                                  | —               | -3.1 $\pm$ 1.8                    | $1.4 \times 10^{-3}$ <sup>a</sup> |                                   |                                   |             |                 |
| Phospholipids                       | CH <sub>2</sub> N(CH <sub>3</sub> ) <sub>3</sub>                                  | 3.75 (br)                          | 2.3 $\pm$ 1.6   | $8.9 \times 10^{-3}$ <sup>a</sup>  | 1.7 $\pm$ 1.4   | $3.4 \times 10^{-2}$              | —                                 | —                                 | —                                 |             |                 |
|                                     | POCH <sub>2</sub>                                                                 | 4.38 (br)                          | —               | —                                  | —               | —                                 | —                                 | -5.9 $\pm$ 2.9                    | $1.2 \times 10^{-4}$ <sup>a</sup> |             |                 |
|                                     | Glyceryl C3H <sub>2</sub>                                                         | 3.94 (br)                          | —               | —                                  | —               | —                                 | —                                 | -5.9 $\pm$ 2.9                    | $5.8 \times 10^{-5}$ <sup>a</sup> |             |                 |
|                                     | Glyceryl C1H <sub>2</sub>                                                         | 4.40 (br)                          | —               | —                                  | —               | —                                 | —                                 | -4.1 $\pm$ 2.2                    | $2.0 \times 10^{-4}$ <sup>a</sup> |             |                 |
|                                     | Glyceryl C2H                                                                      | 5.20 (br)                          | —               | —                                  | —               | —                                 | —                                 | -4.9 $\pm$ 2.5                    | $8.9 \times 10^{-5}$ <sup>a</sup> |             |                 |
|                                     | PTC & SM, N(CH <sub>3</sub> ) <sub>3</sub>                                        | 3.29 - 3.31                        | —               | —                                  | —               | —                                 | —                                 | -5.6 $\pm$ 2.7                    | $5.7 \times 10^{-5}$ <sup>a</sup> |             |                 |
|                                     | PTC, Glyceryl C1H <sub>2</sub>                                                    | 4.12 (m)                           | —               | —                                  | —               | —                                 | —                                 | -3.4 $\pm$ 2.0                    | $7.0 \times 10^{-4}$ <sup>a</sup> |             |                 |

|                          |                                    |           |                |                                |   |                |                                |   |                |                                |
|--------------------------|------------------------------------|-----------|----------------|--------------------------------|---|----------------|--------------------------------|---|----------------|--------------------------------|
| Unassigned<br>resonances | PTE $\text{CH}_2[(\text{NH}_3)^+]$ | 3.15 (br) | —              | —                              | — | —              | —                              | — | $-8.8 \pm 4.1$ | $9.9 \times 10^{-7} \text{ a}$ |
|                          | PTE $[(\text{NH}_3)^+]$            | 8.60 (br) | —              | —                              | — | —              | —                              | — | $-2.3 \pm 1.6$ | $7.4 \times 10^{-3} \text{ a}$ |
|                          | SM                                 | 5.70 (m)  | —              | —                              | — | —              | —                              | — | $2.8 \pm 1.7$  | $4.0 \times 10^{-3} \text{ a}$ |
|                          | U2                                 | 0.60 (d)  | —              | —                              | — | —              | —                              | — | $-2.3 \pm 1.6$ | $1.1 \times 10^{-2} \text{ a}$ |
|                          | U5                                 | 2.61 (s)  | $5.2 \pm 2.6$  | $3.9 \times 10^{-5} \text{ a}$ |   | $-2.2 \pm 1.6$ | $9.4 \times 10^{-3} \text{ a}$ |   | $-1.6 \pm 1.4$ | $4.0 \times 10^{-2}$           |
|                          | U6                                 | 2.99 (s)  | $4.4 \pm 2.3$  | $1.3 \times 10^{-3} \text{ a}$ |   | —              | —                              | — | $-2.1 \pm 1.5$ | $1.6 \times 10^{-2} \text{ a}$ |
|                          | U9                                 | 3.84 (d)  | $-1.8 \pm 1.5$ | $2.8 \times 10^{-2}$           |   | —              | —                              | — | —              | —                              |
|                          | U10                                | 3.90 (br) | —              | —                              | — | —              | —                              | — | $5.5 \pm 2.7$  | $3.4 \times 10^{-5} \text{ a}$ |
|                          | U11                                | 5.29 (t)  | —              | —                              | — | $-2.0 \pm 1.5$ | $1.6 \times 10^{-2} \text{ a}$ |   | —              | —                              |
|                          | U12                                | 8.34 (br) | —              | —                              | — | —              | —                              | — | $4.0 \pm 2.2$  | $2.2 \times 10^{-4} \text{ a}$ |
|                          | U13                                | 0.89 (s)  | —              | —                              | — | —              | —                              | — | $1.8 \pm 1.5$  | $2.6 \times 10^{-2}$           |
|                          | U14                                | 2.20 (q)  | —              | —                              | — | —              | —                              | — | $2.5 \pm 1.7$  | $4.0 \times 10^{-3} \text{ a}$ |
|                          | U15                                | 4.22 (br) | —              | —                              | — | —              | —                              | — | $3.5 \pm 2.0$  | $1.4 \times 10^{-3} \text{ a}$ |
|                          | U16                                | 7.77 (br) | —              | —                              | — | —              | —                              | — | $2.7 \pm 1.7$  | $4.4 \times 10^{-3} \text{ a}$ |
